# Supplementary material
Source: MDPI journal article supplement (https://www.mdpi.com/1996-1073/10/11/1695)
Supplement: s1 [file s1]

Supplementary Materials: Combustion Characteristics of Single Particles from Bituminous Coal and Pine Sawdust in O2/N2, O2/CO2 and O2/H2O Atmospheres

Kai Lei, Buqing Ye, Jin Cao, Rui Zhang and Dong Liu


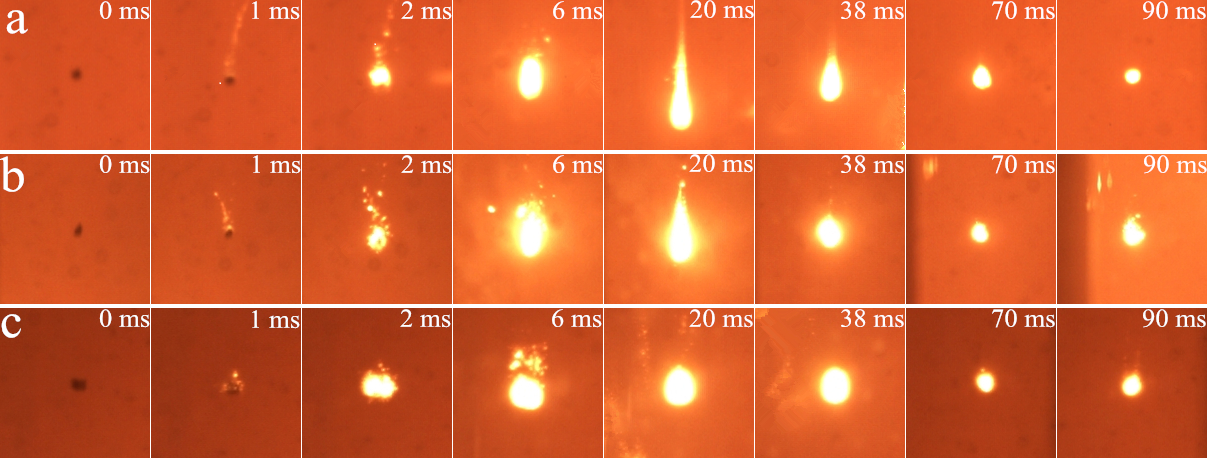


**Figure S1.** The influences of O2 mole fraction on the combustion characteristics of bituminous coal particles in an O2/N2 atmosphere. (**a**) BC-21%O2+79%N2; (**b**) BC-30%O2+70%N2; and (**c**) BC-40%O2+60%N2.


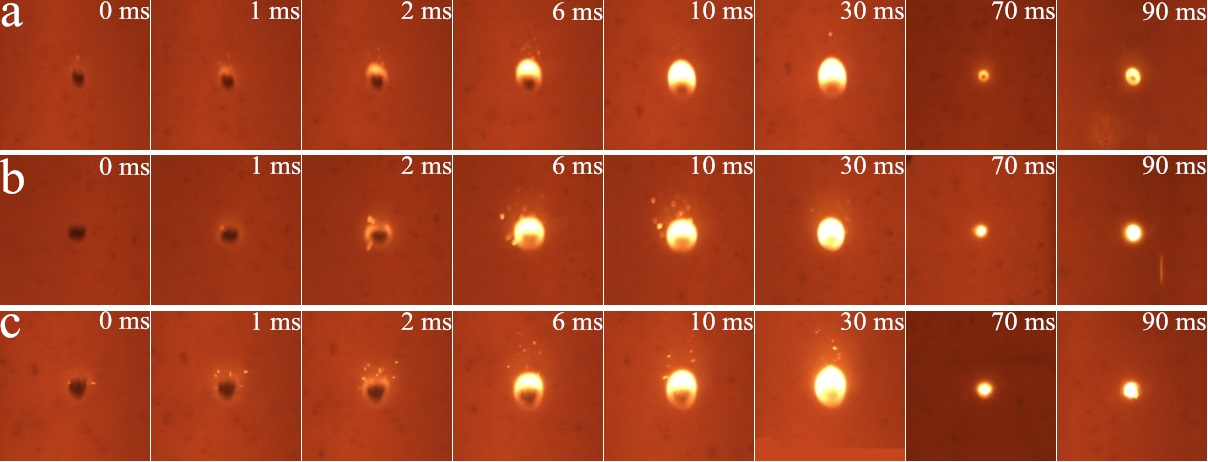


**Figure S2.** The influences of O2 mole fraction on the combustion characteristics of pine sawdust particles in an O2/N2 atmosphere. (**a**) PS-21%O2+79%N2; (**b**) PS-30%O2+70%N2; and (**c**) PS-40%O2+60%N2.


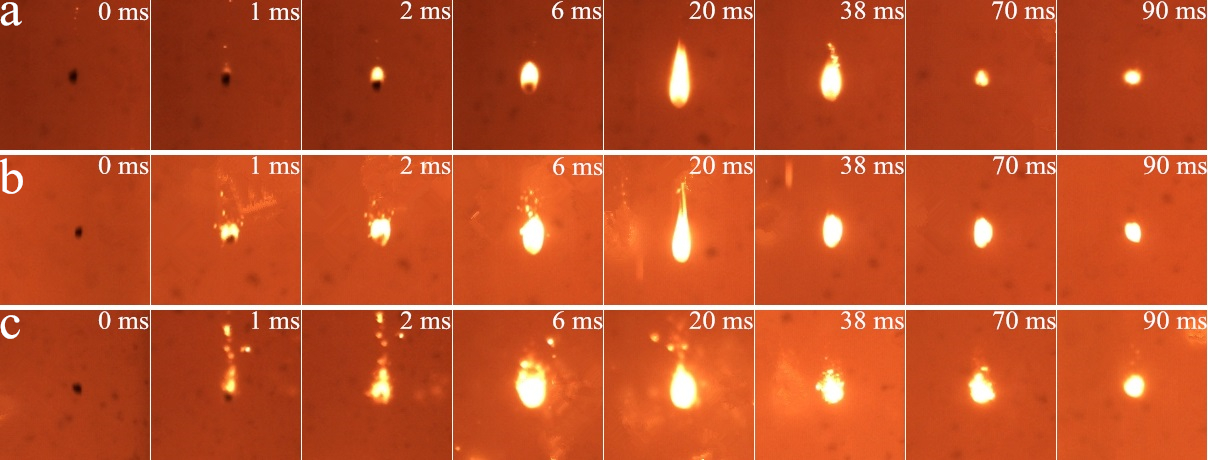


**Figure S3.** The influences of O2 mole fraction on the combustion characteristics of bituminous coal particles in an O2/CO2 atmosphere. (**a**) BC-21%O2+79%CO2; (**b**) BC-30%O2+70%CO2; (**c**) BC-40%O2+60%CO2.


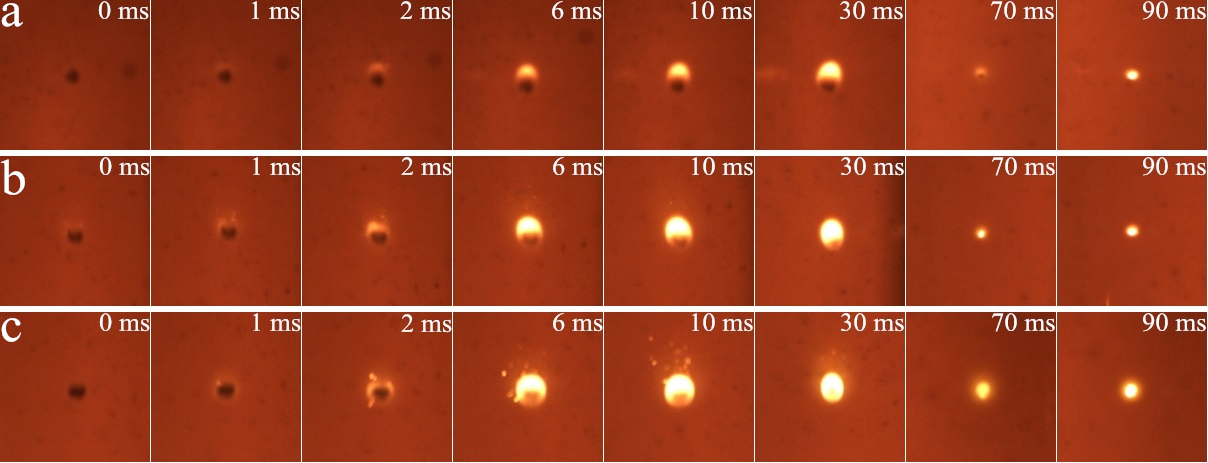


**Figure S4.** The influences of O2 mole fraction on the combustion characteristics of pine sawdust particles in an O2/CO2 atmosphere. (**a**) PS-21%O2+79%CO2; (**b**) PS-30%O2+70%CO2; and (**c**) PS-40%O2+60%CO2.

© 2017 by the authors. Submitted for possible open access publication under the
terms and conditions of the Creative Commons Attribution (CC BY) license (http://creativecommons.org/licenses/by/4.0/).
